# Supplementary material for: Electrochemical sensing of dobutamine, paracetamol, amlodipine, and daclatasvir in serum based on thiourea SAMs over nano-gold particles–CNTs composite
Source: Royal Society of Chemistry journal article supplement (doi:10.1039/d2nj01822e), 2022-01-01
Supplement: d2nj01822e1.pdf [file d2nj01822e1.pdf]

**Supplement Table 1**

| <b>Instrument</b>                                                                                              | <b>Uses</b>                                             |
|----------------------------------------------------------------------------------------------------------------|---------------------------------------------------------|
| BAS-Epsilon electrochemical equipment with a cell contained three electrodes (GCE, platinum wire and Ag/AgCl). | Voltammetry measurements                                |
| Quanta 250 FEG instrument                                                                                      | Scanning electron microscopy FE-SEM measurement         |
| Quanta 250 FEG instrument                                                                                      | energy dispersive X-ray spectroscopy (EDAX) measurement |
| Witec Raman confocal microscope (laser excitation wavelength of 532 nm and 2 mW energy).                       | Raman spectroscopy measurement                          |
| Fourier transform infrared (FTIR) Shimadzu IR-Affinity 1 Spectrometer (Japan).                                 | Surface functional groups characterization              |

**Supplement Table 2:** Comparison of figures of merit of TU-SAMs with different methods mentioned in literature for DB, PA, AM, and DAC determination.

| Electrode                                                | Linear dynamic range ( $\mu\text{M}$ ) |                     |                     |                 | Detection limit (nM) |                   |             |             |
|----------------------------------------------------------|----------------------------------------|---------------------|---------------------|-----------------|----------------------|-------------------|-------------|-------------|
|                                                          | DB                                     | PA                  | AM                  | DAC             | DB                   | PA                | AM          | DAC         |
| RP-HPLC method [29]                                      | 0.165–<br>6.63                         | -                   | -                   | -               | 165                  | -                 | -           | -           |
| Spectrophotometric method [30]                           | 5.3–<br>120                            | -                   | -                   | -               | 5300                 | -                 | -           | -           |
| HPTLC method [43]                                        | -                                      | 238–<br>1190        | -                   | -               | -                    | $238 \times 10^3$ | -           | -           |
| UPLC/DAD method [44]                                     | -                                      | 331–<br>3970        | -                   | -               | -                    | $331 \times 10^3$ | -           | -           |
| Synchronous fluorescence spectrofluorometric method [35] | -                                      | -                   | 0.489–<br>4.89      | -               | -                    | -                 | 12          | -           |
| HPLC method [36]                                         | -                                      | -                   | 0.489–<br>196       | -               | -                    | -                 | 26.9        | -           |
| HPLC method with UV [8]                                  | -                                      | -                   | -                   | 0.0677–<br>2.71 | -                    | -                 | -           | 67.7        |
| HPLC method [9]                                          | -                                      | -                   | -                   | 0.112–<br>4.06  | -                    | -                 | -           | 112         |
| TU-SAMs [This work]                                      | <b>0.03–<br/>20</b>                    | <b>0.05–<br/>40</b> | <b>0.01–<br/>35</b> | <b>0.01–20</b>  | <b>0.85</b>          | <b>3.78</b>       | <b>0.65</b> | <b>0.60</b> |

**RP-HPLC:** Reversed phase-high performance liquid chromatography, **HPTLC:** High-performance thin-layer chromatography, **UPLC/DAD:** Ultra high-performance liquid chromatography-diode array detector-tandem mass spectrometry.

Supplement Figure 1

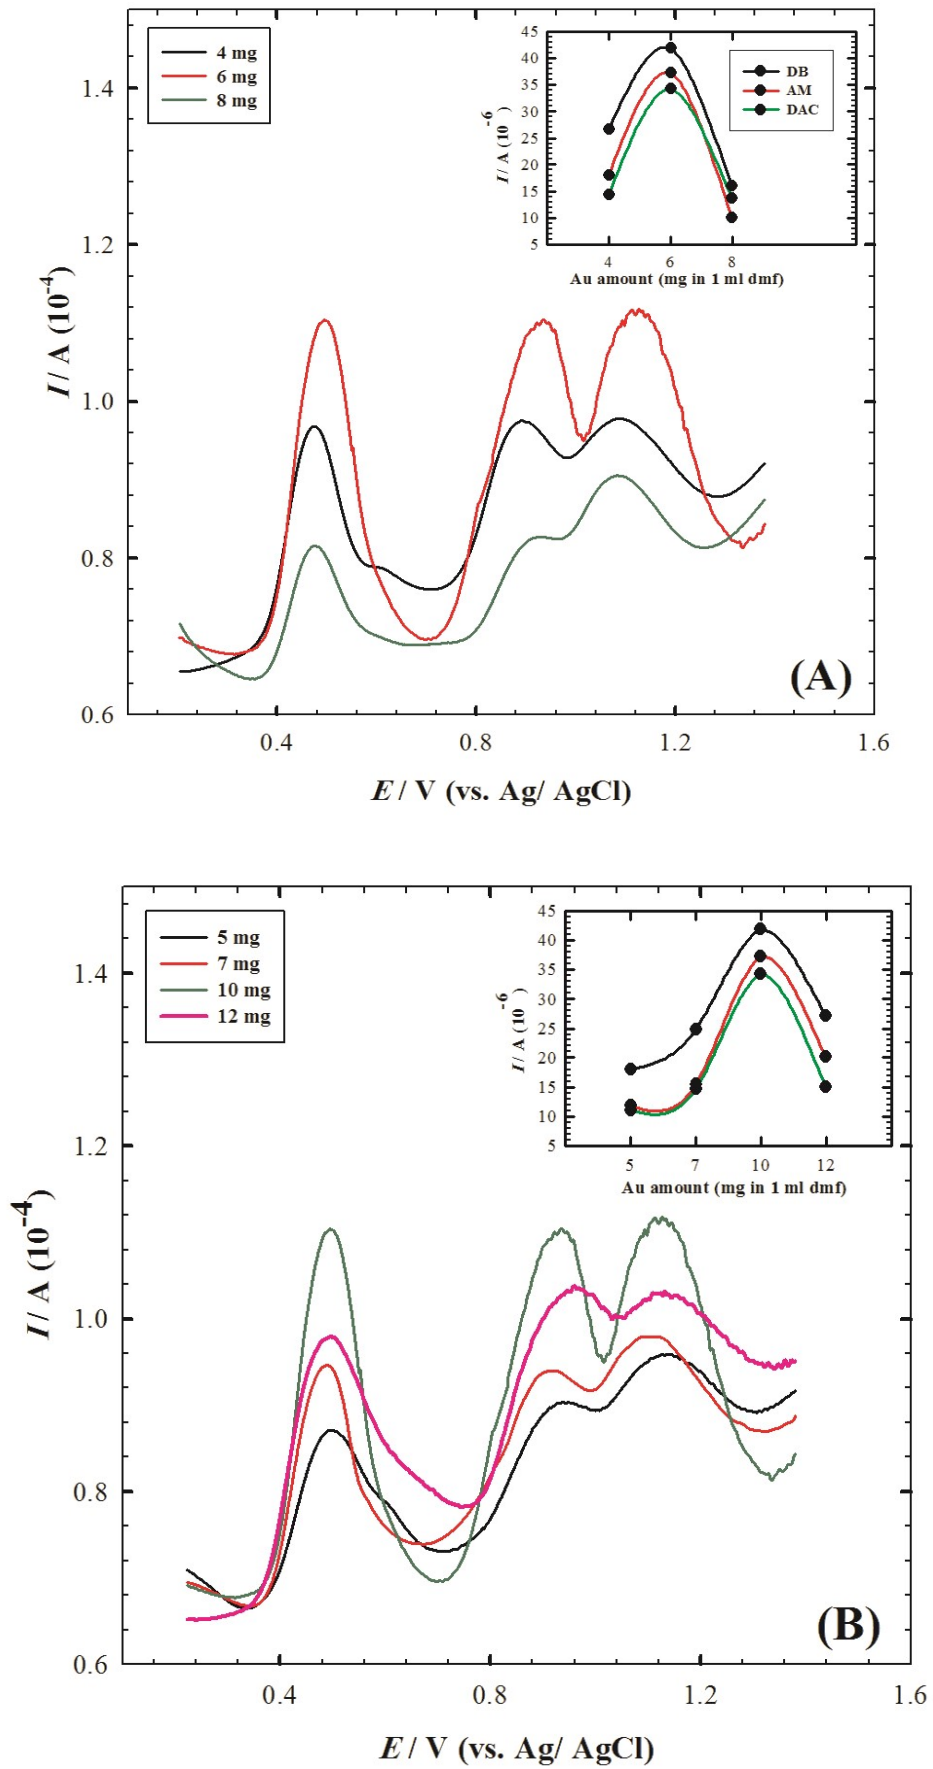

**Suppl. Figure 1(A):** DPVs for 50  $\mu\text{M}$  DB, 50  $\mu\text{M}$  AM and 30  $\mu\text{M}$  DAC prepared in 0.1 M PBS/pH 2.0 recorded at TU-SAMs using different amounts of  $\text{Au}_{\text{nano}}$  (4-8 mg) in 1.0 mL DMF, scan rate 50  $\text{mV}\cdot\text{s}^{-1}$ . Inset; the relation between the anodic peak current for each of DB, AM, and DAC and different  $\text{Au}_{\text{nano}}$  amounts.

**Suppl. Figure 1(B):** DPVs for 50  $\mu\text{M}$  DB, 50  $\mu\text{M}$  AM and 30  $\mu\text{M}$  DAC prepared in 0.1 M PBS/pH 2.0 recorded at TU-SAMs using different amounts of TU (5-12 mg) in 1.0 mL DMF, scan rate 50  $\text{mV}\cdot\text{s}^{-1}$ . Inset; the relation between the anodic peak current for each of DB, AM and DAC and different TU amounts.

**Supplement Figure 2**

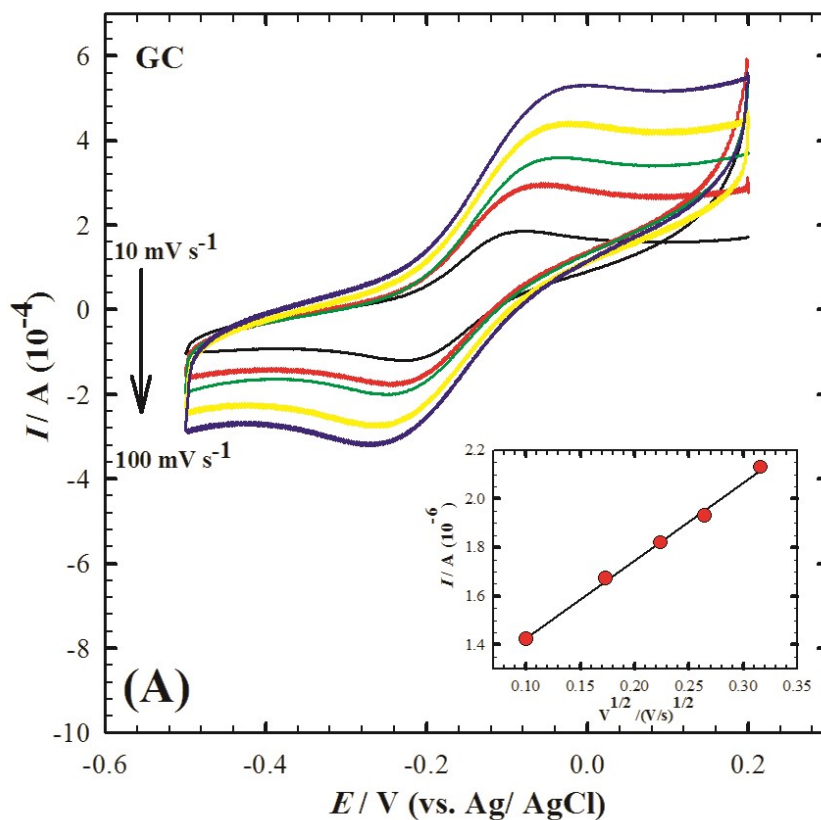

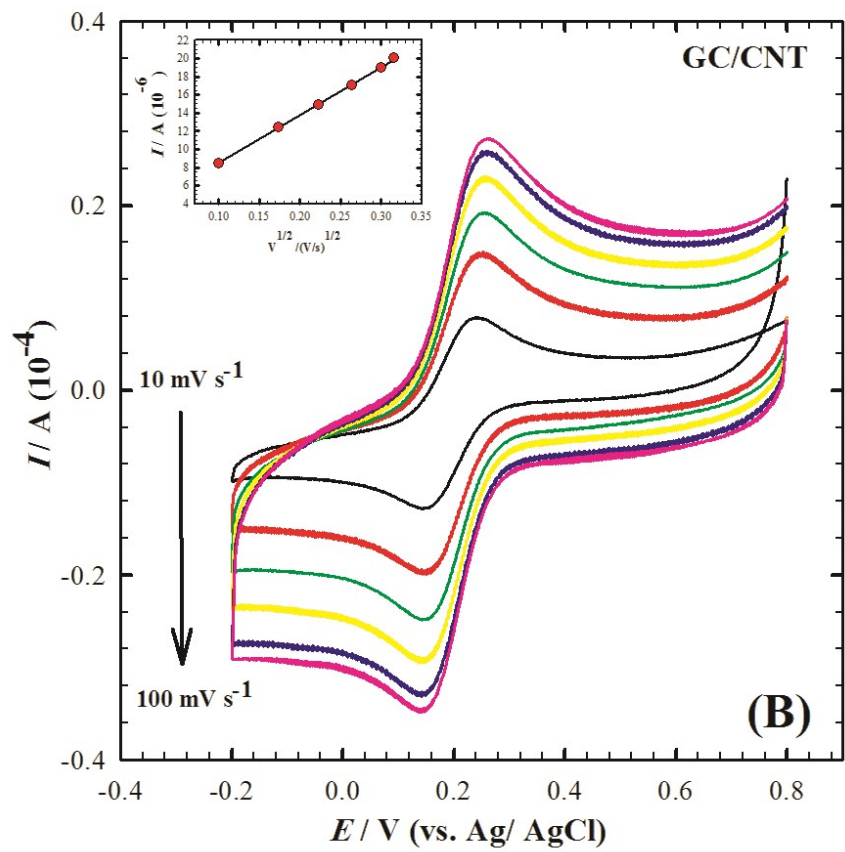

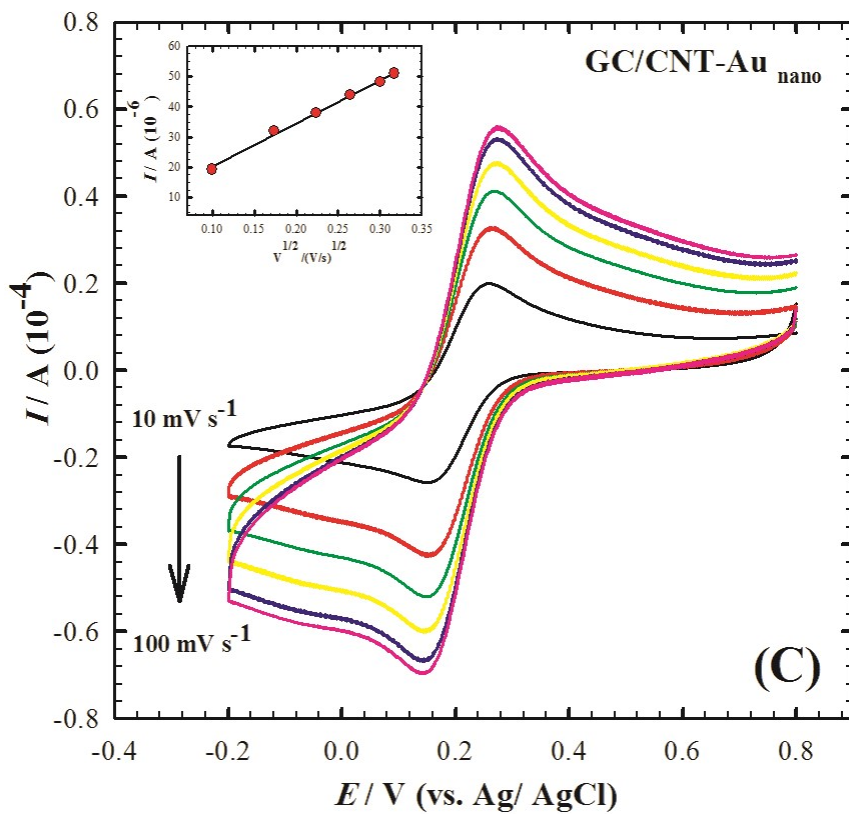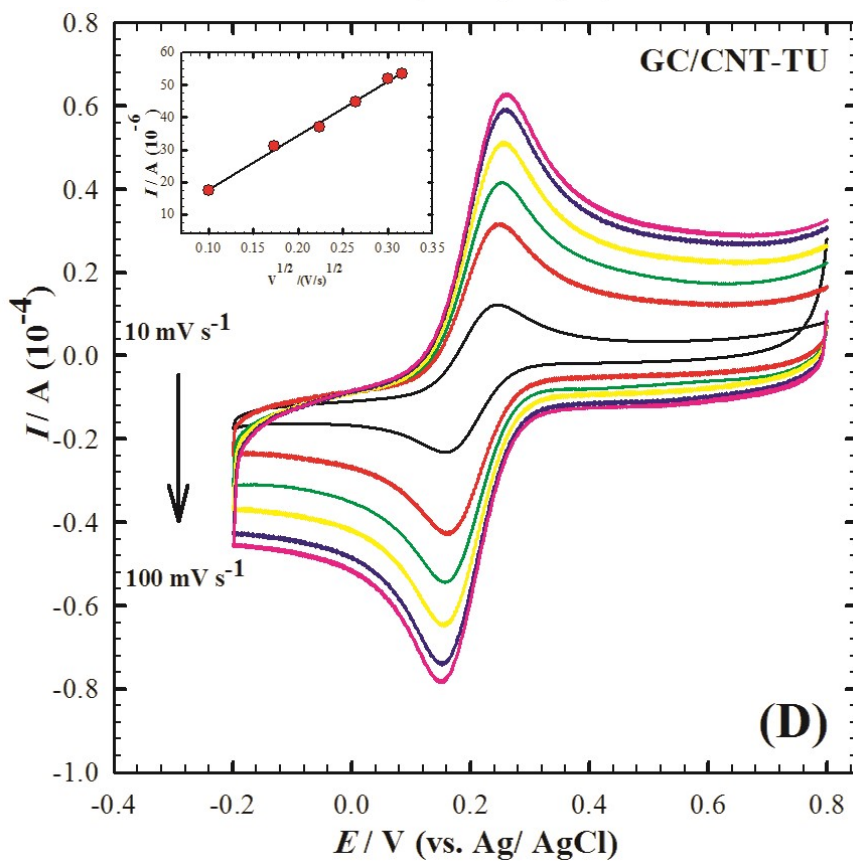

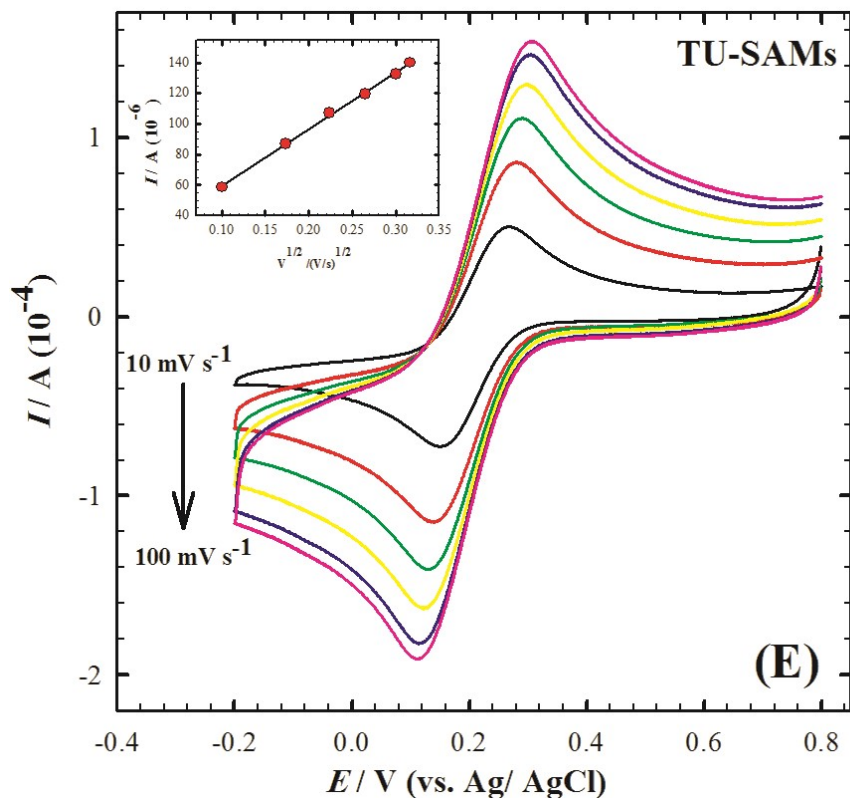

**Suppl. Figure 2:** CVs of 1.0 mM  $K_3[Fe(CN)_6]$  prepared in 0.1 M KCl recorded at (A) GC, (B) GC/CNT, (C) GC/CNT-AU<sub>nano</sub>, (D) GC/CNT-TU, and (E) TU-SAMs at different scan rate values from 10 to 100  $\text{mV}\cdot\text{s}^{-1}$ . Insets: Plot of the peak current of  $K_3[Fe(CN)_6]$  as a function of the square root of scan rate.

Supplement Figure 3

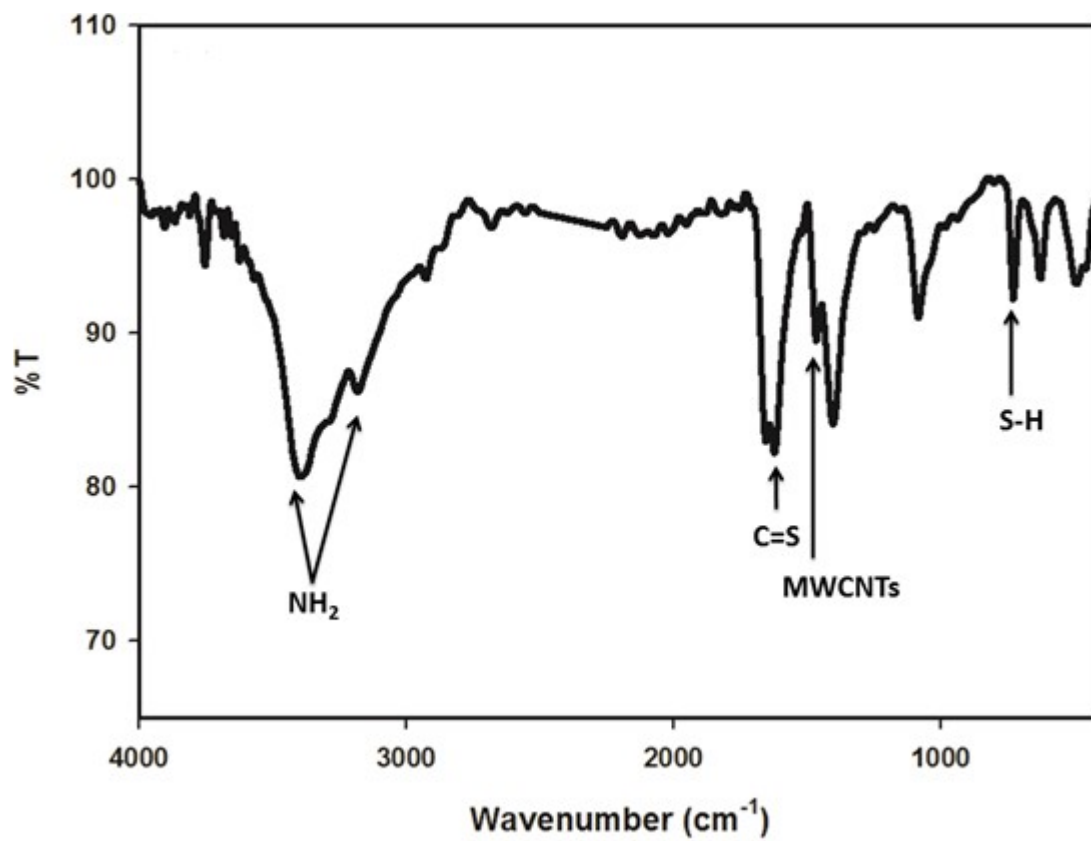

Suppl. Figure 3: FTIR spectrum of CNTs/Au<sub>nano</sub>-TU composite
